# Supplementary material for: Enabling a process-oriented hydro-biogeochemical model to simulate soil erosion and nutrient losses
Source: Copernicus journal article supplement (doi:10.5194/bg-20-3555-2023), 2023-08-24
Supplement: Supplementary file 1 [file bg-20-3555-2023-supplement.zip]

**Table S2** Information of the observation data applied for model calibration and validation.

| Observation    | Period    | Places           | Observed frequency        | Reference         |
|----------------|-----------|------------------|---------------------------|-------------------|
| Surface runoff | 2004–2006 | Lysimetric plot  | Daily after precipitation | Deng et al., 2011 |
| Sediment yield | 2004–2006 | Lysimetric plot  | Daily after precipitation | Deng et al., 2011 |
| PN yield       | 2004–2006 | Lysimetric plot  | Daily after precipitation | Deng et al., 2011 |
| TN yield       | 2004–2006 | Lysimetric plot  | Daily after precipitation | Deng et al., 2011 |
| Surface runoff | 2017–2018 | Lysimetric plot  | Daily after precipitation | Hu, 2020          |
| Sediment yield | 2017–2018 | Lysimetric plot  | Daily after precipitation | Hu, 2020          |
| TP yield       | 2017–2018 | Lysimetric plot  | Daily after precipitation | Hu, 2020          |
| Stream flow    | 2007–2008 | Catchment outlet | Monthly                   | Deng et al., 2011 |
| Sediment yield | 2007–2008 | Catchment outlet | Monthly                   | Deng et al., 2011 |
| PN yield       | 2007–2008 | Catchment outlet | Monthly                   | Deng et al., 2011 |
| TN yield       | 2007–2008 | Catchment outlet | Monthly                   | Deng et al., 2011 |

PN, TN and TP are referred to particulate nitrogen, total nitrogen and total phosphorus, respectively.

### **Reference**

Deng, J., Zhou, Z., Zhu, B., Zheng, X., Li, C., Wang, X., and Jian, Z.: Modeling nitrogen loading in a small watershed in southwest China using a DNDC model with hydrological enhancements, *Biogeosciences*, 8, 2999–3009, <https://doi.org/10.5194/bg-8-2999-2011>, 2011.

Hu, P.: Applicability of revised DNDC model to simulate phosphorus migration on the slope farmland of purple soil, *Institute of Mountain Hazards and Environment, University of Chinese Academy of Sciences, Chengdu*, 35–39, <https://doi.org/10.27525/d.cnki.gkchs.2020.000048>, 2020.
