# Supplementary material for: Enabling a process-oriented hydro-biogeochemical model to simulate soil erosion and nutrient losses
Source: Copernicus journal article supplement (doi:10.5194/bg-20-3555-2023), 2023-08-24
Supplement: Supplementary file 2 [file bg-20-3555-2023-supplement.zip]

Archive with 8 entries (8 files):
- Table S2.pdf
- Table S4.pdf
- Text S1.pdf
- Table S1.pdf
- bg-20-3555-2023-supplement-title-page.pdf
- Text S2.pdf
- Table S3.pdf
- Fig. S1-S8.pdf
