# Supplementary material for: Enabling a process-oriented hydro-biogeochemical model to simulate soil erosion and nutrient losses
Source: Copernicus journal article supplement (doi:10.5194/bg-20-3555-2023), 2023-08-24
Supplement: Supplementary file 2 [file bg-20-3555-2023-supplement.zip › bg-20-3555-2023-supplement-title-page.pdf]

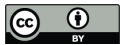

## *Supplement of*

# **Enabling a process-oriented hydro-biogeochemical model to simulate soil erosion and nutrient losses**

**Siqi Li et al.**

*Correspondence to:* Wei Zhang (zhangwei87@mail.iap.ac.cn) and Yong Li (yli@mail.iap.ac.cn)

- [bg-20-3555-2023-supplement-title-page.pdf](#)
- [Fig. S1-S8.pdf](#)
- [Table S1.pdf](#)
- [Table S2.pdf](#)
- [Table S3.pdf](#)
- [Table S4.pdf](#)
- [Text S1.pdf](#)
- [Text S2.pdf](#)

The copyright of individual parts of the supplement might differ from the article licence.
