# Supplementary material for: Enabling a process-oriented hydro-biogeochemical model to simulate soil erosion and nutrient losses
Source: Copernicus journal article supplement (doi:10.5194/bg-20-3555-2023), 2023-08-24
Supplement: Supplementary file 2 [file bg-20-3555-2023-supplement.zip › Table S3.pdf]

**Table S3** Scenrio settings in the model validation year of 2008.

| Group                      | Factor             | Group                         | Scenario                             | Description                                                                       |
|----------------------------|--------------------|-------------------------------|--------------------------------------|-----------------------------------------------------------------------------------|
| Baseline                   | —                  | —                             | Base                                 | Historical 3h $T_{\text{air}}$ and Pre;<br>Conventional tillage and fertilization |
| Single<br>factor<br>change | $T_{\text{air}}^a$ | Lower<br>warming<br>scenario  | $T_{\text{air}}+0.2^{\circ}\text{C}$ | 3h $T_{\text{air}}$ of Base was increased by 0.2 °C                               |
|                            |                    |                               | $T_{\text{air}}+0.4^{\circ}\text{C}$ | 3h $T_{\text{air}}$ of Base was increased by 0.4 °C                               |
|                            |                    |                               | $T_{\text{air}}+0.6^{\circ}\text{C}$ | 3h $T_{\text{air}}$ of Base was increased by 0.6 °C                               |
|                            |                    |                               | $T_{\text{air}}+0.8^{\circ}\text{C}$ | 3h $T_{\text{air}}$ of Base was increased by 0.8 °C                               |
|                            |                    |                               | $T_{\text{air}}+1.0^{\circ}\text{C}$ | 3h $T_{\text{air}}$ of Base was increased by 1.0 °C                               |
|                            |                    |                               | $T_{\text{air}}+1.2^{\circ}\text{C}$ | 3h $T_{\text{air}}$ of Base was increased by 1.2 °C                               |
|                            |                    |                               | $T_{\text{air}}+1.4^{\circ}\text{C}$ | 3h $T_{\text{air}}$ of Base was increased by 1.4 °C                               |
|                            |                    |                               | $T_{\text{air}}+1.6^{\circ}\text{C}$ | 3h $T_{\text{air}}$ of Base was increased by 1.6 °C                               |
|                            |                    |                               | $T_{\text{air}}+1.8^{\circ}\text{C}$ | 3h $T_{\text{air}}$ of Base was increased by 1.8 °C                               |
|                            |                    |                               | $T_{\text{air}}+2.0^{\circ}\text{C}$ | 3h $T_{\text{air}}$ of Base was increased by 2.0 °C                               |
|                            |                    | Higher<br>warming<br>scenario | $T_{\text{air}}+2.2^{\circ}\text{C}$ | 3h $T_{\text{air}}$ of Base was increased by 2.2 °C                               |
|                            |                    |                               | $T_{\text{air}}+2.4^{\circ}\text{C}$ | 3h $T_{\text{air}}$ of Base was increased by 2.4 °C                               |
|                            |                    |                               | $T_{\text{air}}+2.6^{\circ}\text{C}$ | 3h $T_{\text{air}}$ of Base was increased by 2.6 °C                               |
|                            |                    |                               | $T_{\text{air}}+2.8^{\circ}\text{C}$ | 3h $T_{\text{air}}$ of Base was increased by 2.8 °C                               |
|                            |                    |                               | $T_{\text{air}}+3.0^{\circ}\text{C}$ | 3h $T_{\text{air}}$ of Base was increased by 3.0 °C                               |
|                            |                    |                               | $T_{\text{air}}+3.2^{\circ}\text{C}$ | 3h $T_{\text{air}}$ of Base was increased by 3.2 °C                               |
|                            |                    |                               | $T_{\text{air}}+3.4^{\circ}\text{C}$ | 3h $T_{\text{air}}$ of Base was increased by 3.4 °C                               |
|                            |                    |                               | $T_{\text{air}}+3.6^{\circ}\text{C}$ | 3h $T_{\text{air}}$ of Base was increased by 3.6 °C                               |
|                            |                    |                               | $T_{\text{air}}+3.8^{\circ}\text{C}$ | 3h $T_{\text{air}}$ of Base was increased by 3.8 °C                               |
|                            |                    |                               | $T_{\text{air}}+4.0^{\circ}\text{C}$ | 3h $T_{\text{air}}$ of Base was increased by 4.0 °C                               |
|                            |                    | Lower<br>cooling<br>scenario  | $T_{\text{air}}-0.2^{\circ}\text{C}$ | 3h $T_{\text{air}}$ of Base was decreased by 0.2 °C                               |
|                            |                    |                               | $T_{\text{air}}-0.4^{\circ}\text{C}$ | 3h $T_{\text{air}}$ of Base was decreased by 0.4 °C                               |
|                            |                    |                               | $T_{\text{air}}-0.6^{\circ}\text{C}$ | 3h $T_{\text{air}}$ of Base was decreased by 0.6 °C                               |
|                            |                    |                               | $T_{\text{air}}-0.8^{\circ}\text{C}$ | 3h $T_{\text{air}}$ of Base was decreased by 0.8 °C                               |
|                            |                    |                               | $T_{\text{air}}-1.0^{\circ}\text{C}$ | 3h $T_{\text{air}}$ of Base was decreased by 1.0 °C                               |
|                            |                    |                               | $T_{\text{air}}-1.2^{\circ}\text{C}$ | 3h $T_{\text{air}}$ of Base was decreased by 1.2 °C                               |
|                            |                    |                               | $T_{\text{air}}-1.4^{\circ}\text{C}$ | 3h $T_{\text{air}}$ of Base was decreased by 1.4 °C                               |
|                            |                    |                               | $T_{\text{air}}-1.6^{\circ}\text{C}$ | 3h $T_{\text{air}}$ of Base was decreased by 1.6 °C                               |
|                            |                    |                               | $T_{\text{air}}-1.8^{\circ}\text{C}$ | 3h $T_{\text{air}}$ of Base was decreased by 1.8 °C                               |
|                            |                    |                               | $T_{\text{air}}-2.0^{\circ}\text{C}$ | 3h $T_{\text{air}}$ of Base was decreased by 2.0 °C                               |
|                            |                    | Higher<br>cooling<br>scenario | $T_{\text{air}}-2.2^{\circ}\text{C}$ | 3h $T_{\text{air}}$ of Base was decreased by 2.2 °C                               |
|                            |                    |                               | $T_{\text{air}}-2.4^{\circ}\text{C}$ | 3h $T_{\text{air}}$ of Base was decreased by 2.4 °C                               |
|                            |                    |                               | $T_{\text{air}}-2.6^{\circ}\text{C}$ | 3h $T_{\text{air}}$ of Base was decreased by 2.6 °C                               |
|                            |                    |                               | $T_{\text{air}}-2.8^{\circ}\text{C}$ | 3h $T_{\text{air}}$ of Base was decreased by 2.8 °C                               |
|                            |                    |                               | $T_{\text{air}}-3.0^{\circ}\text{C}$ | 3h $T_{\text{air}}$ of Base was decreased by 3.0 °C                               |
|                            |                    |                               | $T_{\text{air}}-3.2^{\circ}\text{C}$ | 3h $T_{\text{air}}$ of Base was decreased by 3.2 °C                               |
|                            |                    |                               | $T_{\text{air}}-3.4^{\circ}\text{C}$ | 3h $T_{\text{air}}$ of Base was decreased by 3.4 °C                               |
|                            |                    |                               | $T_{\text{air}}-3.6^{\circ}\text{C}$ | 3h $T_{\text{air}}$ of Base was decreased by 3.6 °C                               |
|                            |                    |                               | $T_{\text{air}}-3.8^{\circ}\text{C}$ | 3h $T_{\text{air}}$ of Base was decreased by 3.8 °C                               |
|                            |                    |                               | $T_{\text{air}}-4.0^{\circ}\text{C}$ | 3h $T_{\text{air}}$ of Base was decreased by 4.0 °C                               |

|                     |                              |                               |                      |                                                                                                      |
|---------------------|------------------------------|-------------------------------|----------------------|------------------------------------------------------------------------------------------------------|
| Multi factor change | Pre <sup>a</sup>             | Lower rain-enhanced scenario  | Pre+2%               | 3h Pre of Base was increased by 2%                                                                   |
|                     |                              |                               | Pre+4%               | 3h Pre of Base was increased by 4%                                                                   |
|                     |                              |                               | Pre+6%               | 3h Pre of Base was increased by 6%                                                                   |
|                     |                              |                               | Pre+8%               | 3h Pre of Base was increased by 8%                                                                   |
|                     |                              |                               | Pre+10%              | 3h Pre of Base was increased by 10%                                                                  |
|                     |                              |                               | Pre+12%              | 3h Pre of Base was increased by 12%                                                                  |
|                     |                              |                               | Pre+14%              | 3h Pre of Base was increased by 14%                                                                  |
|                     |                              |                               | Pre+16%              | 3h Pre of Base was increased by 16%                                                                  |
|                     |                              |                               | Pre+18%              | 3h Pre of Base was increased by 18%                                                                  |
|                     |                              |                               | Pre+20%              | 3h Pre of Base was increased by 20%                                                                  |
|                     |                              | Higher rain-enhanced scenario | Pre+22%              | 3h Pre of Base was increased by 22%                                                                  |
|                     |                              |                               | Pre+24%              | 3h Pre of Base was increased by 24%                                                                  |
|                     |                              |                               | Pre+26%              | 3h Pre of Base was increased by 26%                                                                  |
|                     |                              |                               | Pre+28%              | 3h Pre of Base was increased by 28%                                                                  |
|                     |                              |                               | Pre+30%              | 3h Pre of Base was increased by 30%                                                                  |
|                     |                              | Lower rain-reduced scenario   | Pre-2%               | 3h Pre of Base was decreased by 2%                                                                   |
|                     |                              |                               | Pre-4%               | 3h Pre of Base was decreased by 4%                                                                   |
|                     |                              |                               | Pre-6%               | 3h Pre of Base was decreased by 6%                                                                   |
|                     |                              |                               | Pre-8%               | 3h Pre of Base was decreased by 8%                                                                   |
|                     |                              |                               | Pre-10%              | 3h Pre of Base was decreased by 10%                                                                  |
|                     |                              |                               | Pre-12%              | 3h Pre of Base was decreased by 12%                                                                  |
|                     |                              |                               | Pre-14%              | 3h Pre of Base was decreased by 14%                                                                  |
|                     |                              |                               | Pre-16%              | 3h Pre of Base was decreased by 16%                                                                  |
|                     |                              |                               | Pre-18%              | 3h Pre of Base was decreased by 18%                                                                  |
|                     |                              | Higher rain-reduced scenario  | Pre-20%              | 3h Pre of Base was decreased by 20%                                                                  |
|                     |                              |                               | Pre-22%              | 3h Pre of Base was decreased by 22%                                                                  |
|                     |                              |                               | Pre-24%              | 3h Pre of Base was decreased by 24%                                                                  |
|                     |                              |                               | Pre-26%              | 3h Pre of Base was decreased by 26%                                                                  |
|                     |                              |                               | Pre-28%              | 3h Pre of Base was decreased by 28%                                                                  |
|                     |                              |                               | Pre-30%              | 3h Pre of Base was decreased by 30%                                                                  |
|                     | Land use                     | —                             | UFL                  | Sloping upland of Base was changed into forest land                                                  |
|                     | Tillage                      | —                             | No tillage           | Traditional tillage of Base was changed into no tillage                                              |
|                     | $T_{air}$ and Pre            | —                             | Low GHG <sup>a</sup> | 3h $T_{air}$ and Pre of Base were increased by 1.5 °C and 10%, respectively                          |
|                     |                              | —                             | High GHG             | 3h $T_{air}$ and Pre of base were increased by 4 °C and 30%, respectively                            |
|                     | $T_{air}$ , Pre and land use | —                             | Low GHG with UFL     | 3h $T_{air}$ and Pre of Base were increased by 1.5 °C and 10%, respectively, in a combination of UFL |
|                     |                              | —                             | High GHG with UFL    | 3h $T_{air}$ and Pre of Base were increased by 4 °C and 30%, respectively, in a combination of UFL   |

<sup>a</sup>  $T_{\text{air}}$ , Pre and GHG are the abbreviations of air temperature, precipitation and greenhouse gas, respectively.
