# Supplementary material for: Enabling a process-oriented hydro-biogeochemical model to simulate soil erosion and nutrient losses
Source: Copernicus journal article supplement (doi:10.5194/bg-20-3555-2023), 2023-08-24
Supplement: Supplementary file 2 [file bg-20-3555-2023-supplement.zip › Table S4.pdf]

**Table S4** Examples for the effects of temperature on biogeochemical processes in CNMM-DNDC model.

| Equations                                                                                                                            | Description                                  |
|--------------------------------------------------------------------------------------------------------------------------------------|----------------------------------------------|
| $C_L \frac{\partial T}{\partial t} = \frac{\partial}{\partial z} (K_L \frac{\partial T}{\partial z})$                                | Heat conduction                              |
| $f_{T3} = \frac{I}{1 + \exp(0.2 \times (10 - T_{air}))}$                                                                             | Effects of low $T_{air}$ on $C_3$ plant      |
| $f_{T4} = \frac{I}{(1 + \exp(0.3 \times (13 - T_{air}))) \times (1 + \exp(0.3 \times (T_{air} - 36)))}$                              | Response of $C_4$ plant to extreme $T_{air}$ |
| $F_T = -0.0014 \times T_{soil}^2 + 0.0992 \times T_{soil} + 0.00198$                                                                 | Effects of $T_{soil}$ on decomposition       |
| $F_T = 3.503^{\frac{60 - T_{soil}}{60 - 34.22}} \times \exp(\frac{3.503 \times (T_{soil} - 34.22)}{60 - 34.22})$                     | Effects of $T_{soil}$ on nitrification       |
| $F_T = a \times 2^{\frac{T_{soil} - 22.5}{10.0}}$                                                                                    | Effects of $T_{soil}$ on denitrifier growth  |
| $F_T = \exp(0.2424 * T_{soil})$                                                                                                      | Effects of $T_{soil}$ on $CH_4$ production   |
| $F_{Ti} = -0.1687 \times (0.1 \times T(L))^3$<br>$+ 1.167 \times (0.1 \times T(L))^2$<br>$- 2.0303 \times (0.1 \times T(L)) + 1.042$ | Effects of $T_{soil}$ on $CH_4$ emission     |

$T_{soil}$  and  $T_{air}$  are referred to air temperature and soil temperature, respectively.  $L$  represents soil layer.
