# Supplementary material for: Enabling a process-oriented hydro-biogeochemical model to simulate soil erosion and nutrient losses
Source: Copernicus journal article supplement (doi:10.5194/bg-20-3555-2023), 2023-08-24
Supplement: Supplementary file 2 [file bg-20-3555-2023-supplement.zip › Text S2.pdf]

## The complete physical processes of the ROSE module

The ROSE model is a mechanistic model based on the physical processes of soil erosion (Rose et al., 1983; Stewart, 1985), which predicts the intensity of water-induced soil erosion by conceiving and simulating three continuous and simultaneous physical processes of rainfall detachment ( $e$ ), sediment entrainment ( $r$ ) and sediment deposition ( $d$ ).

First of all, the eroded sediment particles are divided into a number of classes ( $I$ ) based on their size ranges. Assuming no flux of water entering the up-slope edge of the planar land unit, the mass conservation of sediment in an elementary unit can be provided as Eq. S1. The first and second terms on the left-hand side in Eq. S1 represents the sediment amount flowing accompany with and remaining in the surface runoff, respectively.  $D$  (m) and  $q$  ( $\text{m}^2 \text{s}^{-1}$ ) are referred to the water depth and the flux of the surface runoff, respectively. And  $q$  is calculated from the product of the surface runoff rate per unit area ( $Q$ ,  $\text{m s}^{-1}$ ) and the distance down the planar land unit ( $x$ , m). Assuming the equal mass of each range class of the sediment particles, the sediment concentration ( $c_i$ ) of size class  $i$  can be calculated from the total sediment concentration ( $c$ ) and  $I$ , as shown in Eq. S2.

$$\frac{\partial}{\partial x}(qc_i) + \frac{\partial}{\partial t}(Dc_i) = e_i - d_i + r_i \quad \text{S1}$$

$$c_i = c/I \quad \text{S2}$$

The detachment rate ( $e_i$ ) is proportional to the fraction of soil exposed to the raindrops ( $C_e$ ). Assuming that the rainfall detachment process is unselective with

respect to the size of the detached sediment, then  $e_i$  by the rainfall ( $P$ ) for the sediment size range class  $i$  can be calculated as Eq. S3. The detachability of soil by rainfall ( $\alpha$ ) in Eq. S3 is related to soil type, management practices and the depth of surface runoff.

$$e_i = \alpha C_e P^2 / I \quad \text{S3}$$

The sediment deposition rate ( $d_i$ ) is greatly influenced by the sizes of the sediment particles, which is calculated as Eq. S4 based on the settling velocity ( $v_i$ ) of the sediment particle size class  $i$  and  $c_i$ .

$$d_i = v_i c_i \quad \text{S4}$$

The rate of sediment entrainment ( $r_i$ ) is linearly related to the stream power ( $\Omega$ ,  $\text{kg m}^{-2} \text{s}^{-1} \text{m}^{-1}$ ), which is calculated by Eq. S5.  $\rho$  and  $g$  are referred to the water density with the value of  $1.0 \times 10^3 \text{ kg m}^{-3}$  and the acceleration of gravity with the value of  $9.8 \text{ m s}^{-2}$ , respectively.  $S$  (dimensionless) is referred to the sine of the land slope in the radian value. Then the entrained sediment mass flux ( $q_s$ ) and the sediment entrainment efficiency ( $K$ ) can be computed by Eq. S6 and Eq. S7, respectively. The efficiency of bed-load transport ( $\eta$ ) in Eq. S7 varies with the soil types, management practices and surface runoff. The value of  $0.276$  (in  $\text{kg m}^{-3}$ ) in Eq. S7 is assumed as the specific gravity of sediment.  $x^*$  is the distance down the planar land unit where the entrainment occurrence. The stream power at the place of the entrainment occurrence ( $\Omega_0$ ) is calculated using Eq. S8. The  $c$  can be obtained by substituting Eq. S5 and Eq. S8 into Eq. S6, as shown in Eq. S9. According to the law of mass conservation,  $r_i$  should be the sum of the  $d_i$ , the sediment amount flowing accompany with and

remaining in surface runoff, as shown in Eq. S10.

$$\Omega = \rho g S Q x \quad \text{S5}$$

$$q_s = qc = K(\Omega - \Omega_0) \quad \text{S6}$$

$$K = 0.276\eta \quad \text{S7}$$

$$\Omega_0 = \rho g S Q (1 - x_*) \quad \text{S8}$$

$$c = \rho g S K (1 - x_*/x) \quad \text{S9}$$

$$r_i = d_i + \frac{\partial qc_i}{\partial x} + \frac{\partial}{\partial t} (Dc_i) \quad \text{S10}$$

Equation S11 is obtained by substituting Eq. S4 and Eq. S9 into Eq. S10 to calculate  $r_i$ . For an individual planar land unit, a portion of the soil is exposed to the entrainment by surface runoff ( $C_r$ ), while the remaining soil is protected by the land covers (e.g., vegetation, buildings, rocks, and other soil cover materials). If  $C_r$  is introduced as a multiplier into the right-hand side of Eq. S9 to affect  $c_i$  and into the second term on the right-hand side of Eq. S11. Then, Eq. S9 can be rearranged as Eq. S12.  $\beta_i$  in Eq. S12 can be calculated by Eq. S13.

$$r_i = v_i c_i + \rho g S K Q / I + \frac{\partial}{\partial t} (Dc_i) \quad \text{S11}$$

$$r_i = C_r(\rho g SK Q/I)(\beta_i - \frac{v_i x^*}{Qx}) + \frac{\partial}{\partial t}(Dc_i) \quad \text{S12}$$

$$\beta_i = 1 + \frac{v_i}{Q} \quad \text{S13}$$

Substituting Eq. S3, S4 and S12 into Eq. S1, the partial differentiation term  $\frac{\partial}{\partial t}(Dc_i)$  on the right-hand side in Eq. S12 can be reduced. The  $c_i$  of all sediment particle size classes are summed up to obtain the total sediment concentration ( $c(L, t)$ ) of a planar land unit with the slope length of  $L$  as a function of time  $t$ , as shown in Eq. S14.

$$c(L, t) = (\alpha C_e P^2 / QI) \sum_{i=1}^I (1/\beta_i) + \rho g SK C_r (1 - \frac{x^*}{L}) \quad \text{S14}$$

The larger the surface runoff and the sediment yield, the smaller the first term on the right-hand side of Eq. S14 is compared with the second term. For example, in a typical surface runoff event with 50 mm h<sup>-1</sup> rainfall and 30 mm h<sup>-1</sup> surface runoff for a typical planar land unit with a slope of 6%, the second term on the right-hand side of Eq. S14 is approximately 1000 times larger than the first term. Although the ratios of the two terms on the right-hand side of Eq. S14 vary rapidly with the soil and hydraulic conditions, this example does justify the neglect of the first term on the right-hand side of Eq. S14 during a typical soil erosion period. In fact, even for a fairly small erosion event, neglecting the first term on the right-hand side of Eq. (14) still provides a good approximation whose accuracy is usually higher than the inherent uncertainty in the observations used to calibrate it. Thus, Eq. S14 can be simplified to

$$c(L, t) = \rho g S K C_r (1 - \frac{x^*}{L}) = 2700 S \eta C_r (1 - \frac{x^*}{L}) \quad S15$$

However, if  $x^*$  is replaced by the time mean value of  $\bar{x}^*$ , and assuming  $\eta$  is a constant,  $c$  is a function of the slope length  $L$ .

$$c(L, t) = 2700 S \eta C_r (1 - \frac{\bar{x}^*}{L}) \quad S16$$

When the slope length of  $L$  is not less than approximately 30 m,  $x^*$  is much smaller than the slope length of  $L$  during most of the whole water-induced soil erosion processes. During the early and late periods of a surface runoff event with the small surface runoff volume,  $x^*$  is non-negligible compared with  $L$ , but the sediment yield is only a small fraction of that lost in the whole soil erosion event. That is, the sediment entrainment by the surface runoff dominates the overall water-induced soil erosion process, while the two processes of rainfall detachment and sediment deposition are usually negligible. Therefore,  $c$  can be approximated by Eq. S17.

$$c = 2700 S \eta C_r \quad S17$$

The upgraded CNMM-DNDC introduced the total sediment concentration ( $c$ ) calculated by the simplified ROSE model shown in Eq. S17 into its hydrological framework. Then the yield of the water-induced sediment ( $Y_s$ , kg ha<sup>-1</sup>) for an individual surface runoff event was calculated from the surface runoff amount ( $R_s$ , m) and  $c$  over the simulation time step, as shown in Eq. S18.

$$Y_s = c R_s \quad S18$$

### ***Reference***

Rose, C., Williams, J., Sander, G., and Barry, D.: A mathematical model of soil erosion and deposition processes: I. theory for a plane land element, Soil Science Society of America Journal, 47, 991–995, <https://doi.org/10.2136/sssaj1983.03615995004700050030x>, 1983.

Stewart, B.: Advance in soil science, Springer-Verlag, New York Berlin Heidelberg Tokyo, 18–55, 1985.
